# Supplementary figures and images for: Acceptability of different oral dosage forms in paediatric patients in hospital setting
Source: HighWire-hosted journal article supplement (doi:10.1136/archdischild-2021-322604), 2021-11-19

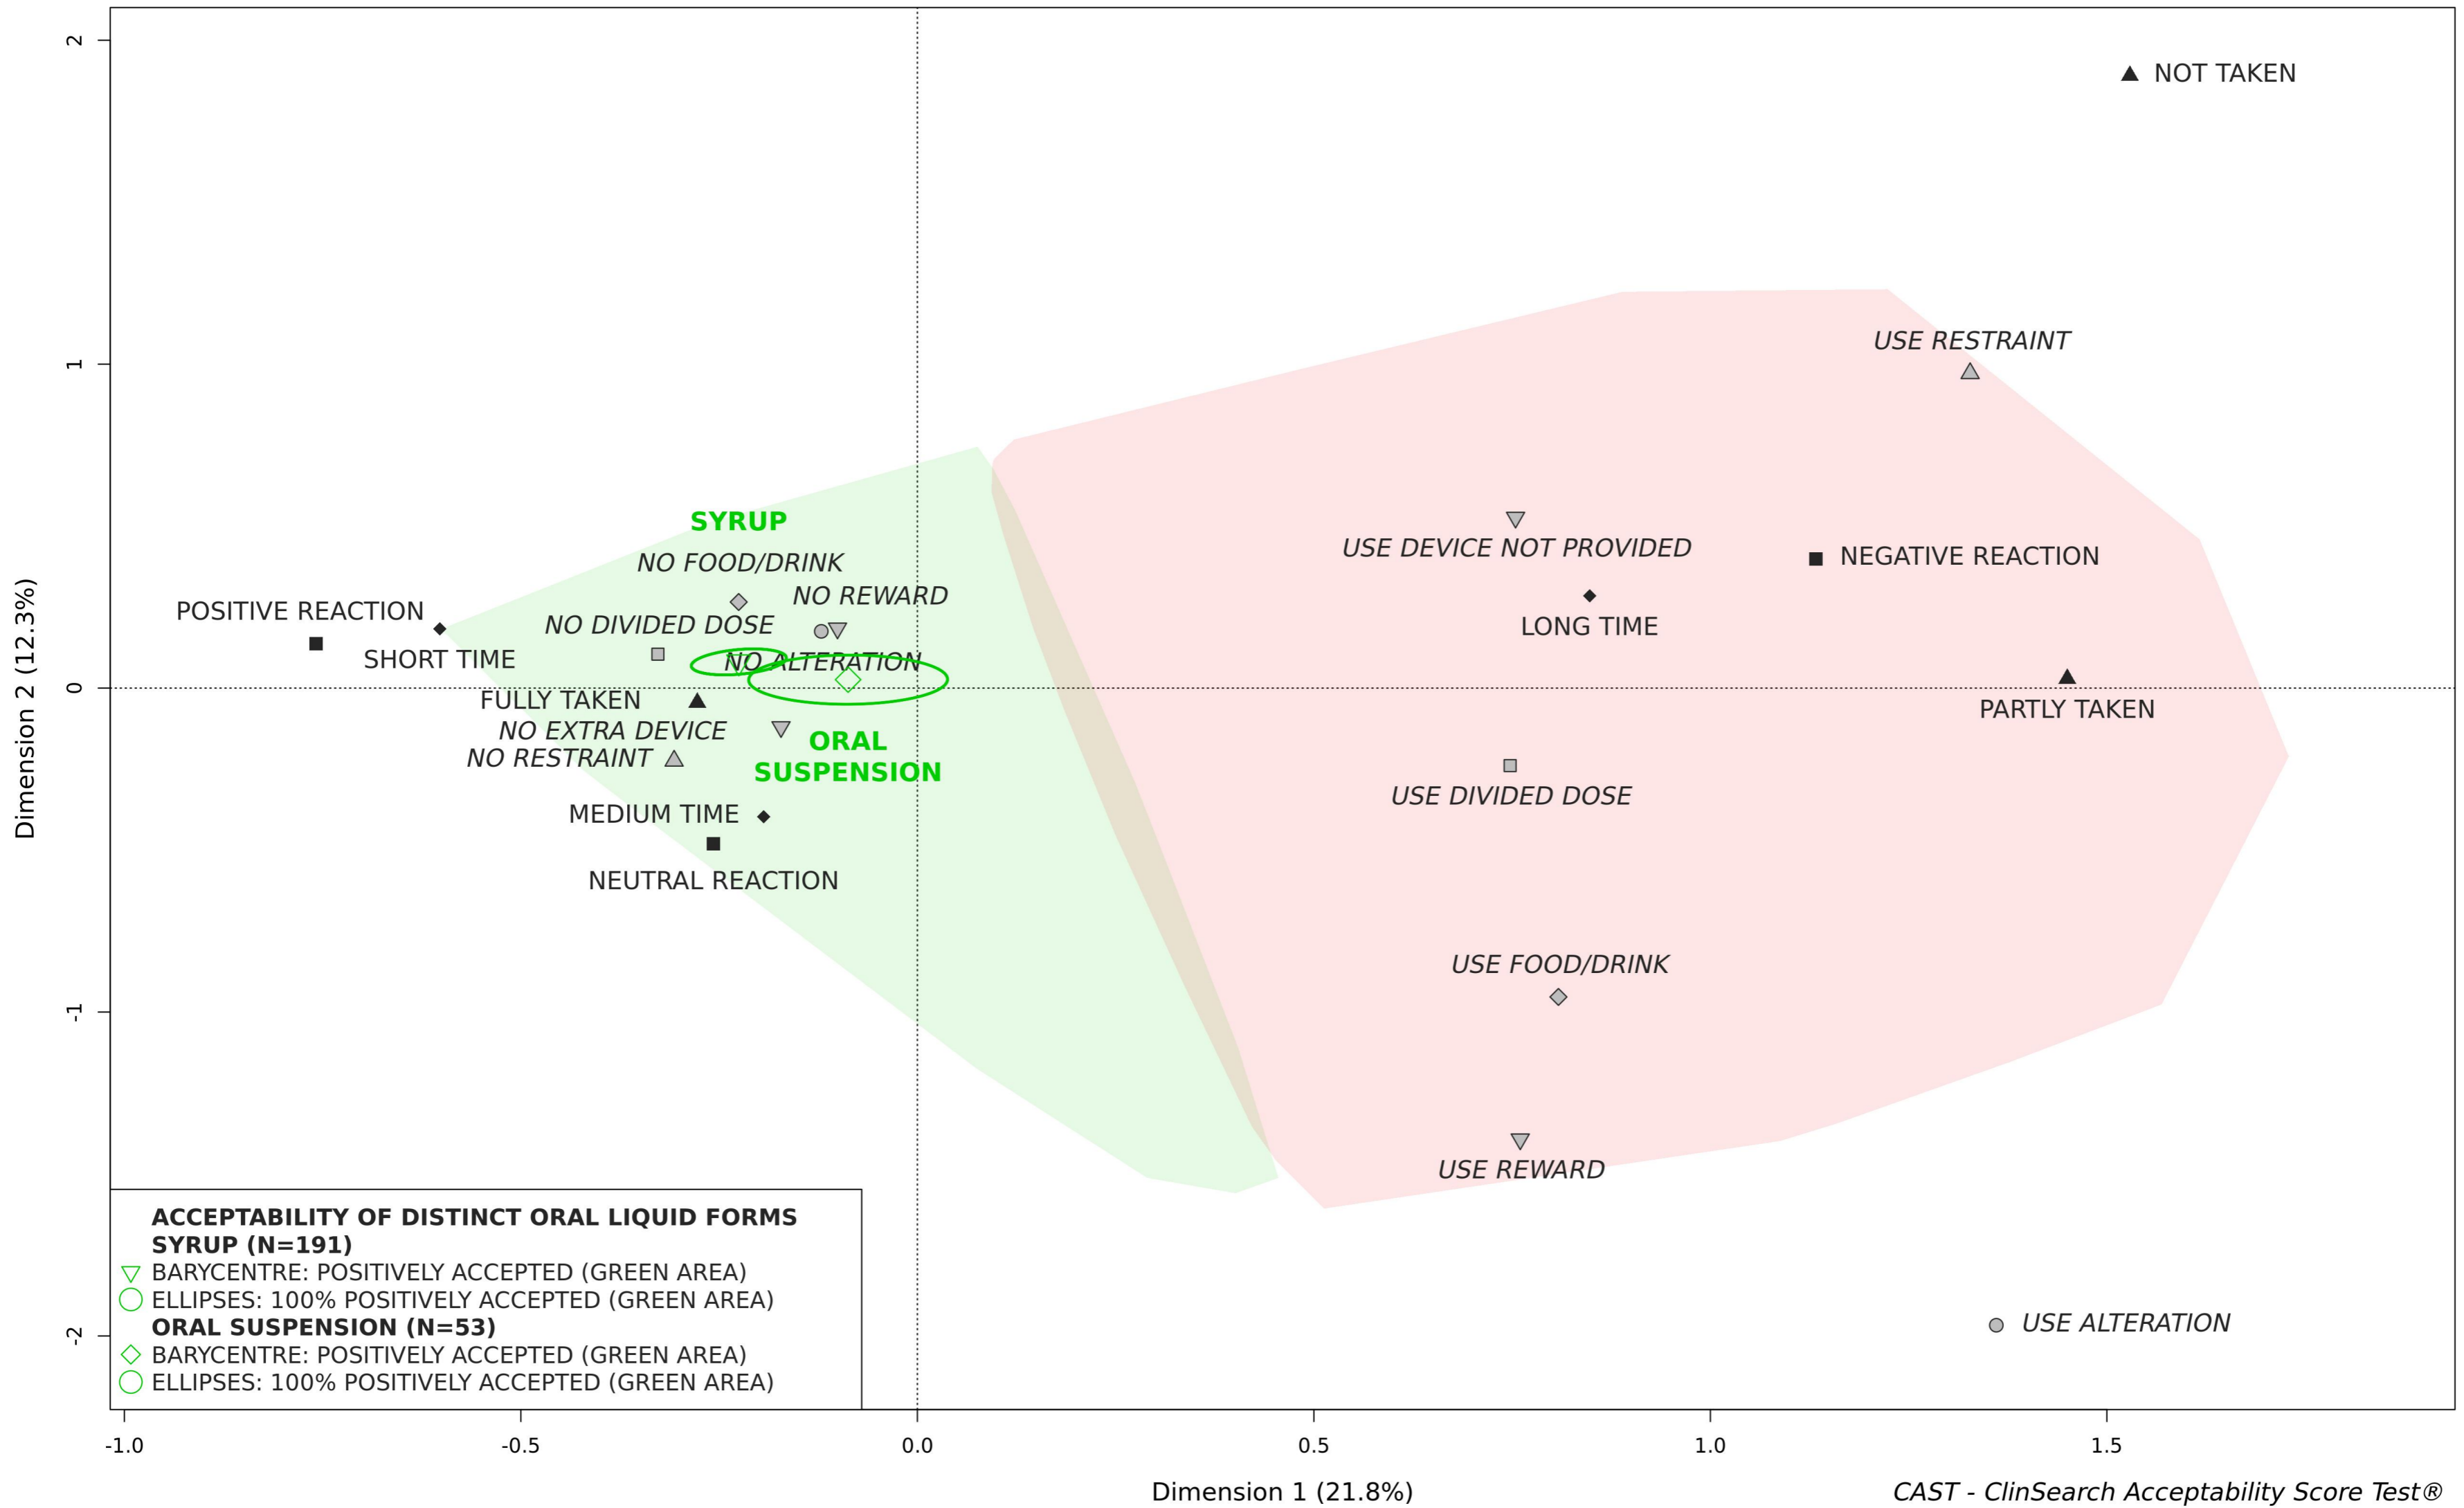

Supplement: archdischild-2021-322604supp001_data_supplement.pdf [file archdischild-2021-322604supp001_data_supplement.pdf]
